# Supplementary material for: Exploring the kinetics of actinyl–EDTA reduction by ferrous iron using quantum-mechanical calculations
Source: Royal Society of Chemistry journal article supplement (doi:10.1039/d0cp05179a), 2021-01-01
Supplement: d0cp05179a1.pdf [file d0cp05179a1.pdf]

## **Supplementary Information for**

# **Exploring the kinetics of actinyl-EDTA reduction by ferrous iron using quantum-mechanical calculations**

Sooyeon Kim, Will M. Bender, and Udo Becker\*

Department of Earth and Environmental Sciences, University of Michigan, 2534 North  
University Building, 1100 North University Avenue, Ann Arbor, MI 48109-1005, USA

\*Corresponding author Udo Becker. Tel.: +1 734 615-6894; email: [ubecker@umich.edu](mailto:ubecker@umich.edu)

## Test of density functionals and basis sets

We performed the reduction kinetics calculation using B3LYP hybrid functional,<sup>1, 2</sup> which has proven to produce reliable results for actinide complexes.<sup>3-5</sup> However, in order to show the influence of the selected density functionals, we tested several density functionals here and compared the results. In addition to B3LYP (hybrid), we tested PBE0 (hybrid)<sup>6</sup> and M06L (meta-GGA).<sup>7</sup> From the results, the positions of energy minima and activation energy barriers were almost the same (differences <0.25 Å, Table S1). However, there are some changes in the  $E_a$  (activation energies of dehydration) values. Using the PBE0 functional results in an increase in  $E_a$  by 7 kJ/mol in the forward reaction (OSC to ISC) and 8 kJ/mol in the backward reaction (ISC to OSC). Normalized total energy values for the ISC and OSC are close to the B3LYP results with less than 13 kJ/mol differences. M06L results in a similar value for  $E_{a,back}$ , but more significant change (-9 kJ/mol) in  $E_a$  than using the PBE0 functional.

In addition, two different basis sets were tested at the B3LYP level for actinide elements (An = U, Np, and Pu) to see if there is a significant energy change due to the change of basis sets. With LANL2DZ<sup>8, 9</sup> on lighter elements, we compared Stuttgart relativistic small-core (RSC)<sup>10, 11</sup> vs. Stuttgart relativistic large-core (RLC)<sup>12</sup> basis sets with their corresponding pseudopotentials. The same as in the density functional test, the position of energy minima at ISC and OSC are very close to each other (Table S2).  $E_a$  values are very similar, but  $E_{a,back}$  increased by 13 kJ/mol. Previous studies that compared Stuttgart RSC and RLC basis sets showed that Stuttgart RSC produces more comparable dissociation energies with experiment,<sup>13</sup> and Stuttgart RLC yields poor geometries (too short bonds) and frequency results for  $\text{UO}_2^{2+}$ .<sup>14, 15</sup>

However, there are no reliable experimental data to gauge those results. Therefore, we chose B3LYP in combination with Stuttgart RSC basis sets (for Fe, U, Np, and Pu) and LANL2DZ (for all lighter elements) in this study, which has been used in many previous studies and proven to produce comparable results with experiments.<sup>13, 16, 17</sup>

**Table S1.** Calculated energy barriers (dG (kJ/mol)) for the OSC to ISC transition of  $[\text{UO}_2(\text{edta})]^{2-}$  reduction by ferrous iron using different density functionals.  $\lambda$  represents the distance between the two energy minima (ISC and OSC).

|       | $E_a$<br>(kJ/mol) | $E_{a,back}$<br>(kJ/mol) | ISC minimum<br>U-Fe distance<br>(Å) | OSC minimum<br>U-Fe distance<br>(Å) | $\lambda$ (Å) |
|-------|-------------------|--------------------------|-------------------------------------|-------------------------------------|---------------|
| B3LYP | 60.5              | 49.7                     | 4                                   | 6.75                                | 2.75          |
| PBE0  | 67.4              | 57.7                     | 4                                   | 6.75                                | 2.75          |
| M06L  | 51.8              | 48.6                     | 4                                   | 6.8                                 | 2.8           |

**Table S2.** Calculated energy barriers (dG (kJ/mol)) for the OSC to ISC transition of  $[\text{UO}_2(\text{edta})]^{2-}$  reduction by ferrous iron using two different basis sets.  $\lambda$  represents the distance between the two energy minima (ISC and OSC).

|                   | $E_a$<br>(kJ/mol) | $E_{a,back}$<br>(kJ/mol) | ISC minimum<br>U-Fe distance<br>(Å) | OSC minimum<br>U-Fe distance<br>(Å) | $\lambda$ (Å) |
|-------------------|-------------------|--------------------------|-------------------------------------|-------------------------------------|---------------|
| Stuttgart RSC ECP | 60.5              | 49.7                     | 4                                   | 6.75                                | 2.75          |
| Stuttgart RLC ECP | 59.6              | 56.7                     | 4.25                                | 7                                   | 2.75          |

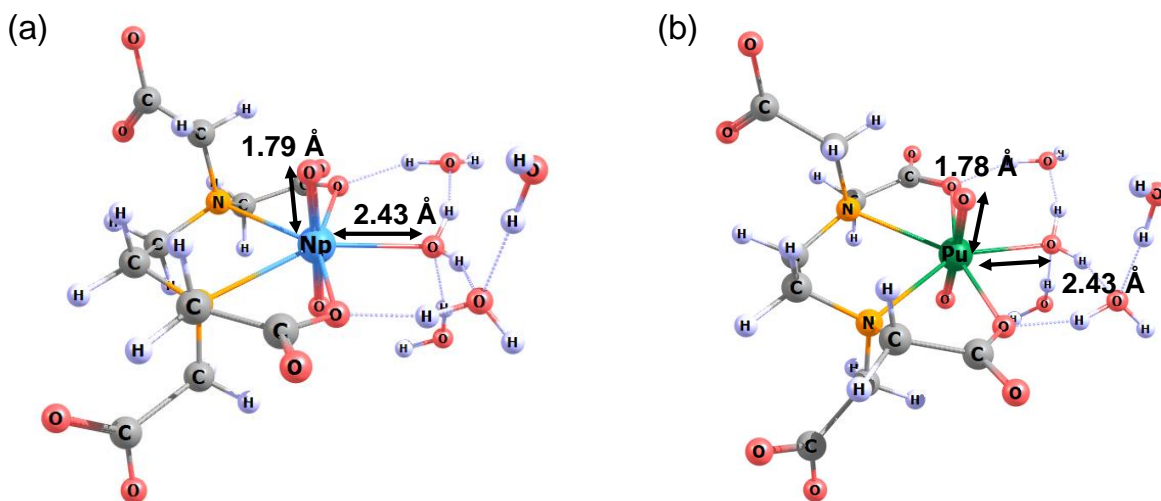

**Fig. S1.** Optimized geometries of (a)  $[\text{NpO}_2(\text{edta})]^{2-}$  and (b)  $[\text{PuO}_2(\text{edta})]^{2-}$  before reaction with the reductant. White-H, gray-C, red-O, orange-N, blue-Np, and green-Pu. The dotted gray lines indicate hydrogen bonds.

### Spin density changes and the effect of spin contamination

The expected and calculated values of the spin and  $\langle S^2 \rangle$  for An(VI)-EDTA and Fe(II) before and after the electron transfer were calculated (Table S3). The total spin densities are the same when compared  $\langle S \rangle$  values before and after the electron transfer. Spin contamination was calculated by comparing calculated  $\langle S^2 \rangle$  with expected values using  $S$  as the sum of spins for Fe and the actinide ions before and after the redox event and then calculating  $S(S+1)$ . Negligible differences were obtained for most model setups except for the Np(V)-Fe(III) system. The effect of spin contamination in DFT methods is less significant than in Hartree-Fock calculations.<sup>18, 19</sup>

**Table S3.** Comparison of the expected and calculated values of the spin and  $\langle S^2 \rangle$  for An(VI)-EDTA and Fe(II) before and after the electron transfer.

| Spin density                                   | <b>U</b>      | <b>Np</b>           |                     | <b>Pu</b>           |                     |
|------------------------------------------------|---------------|---------------------|---------------------|---------------------|---------------------|
|                                                | 0(U)/ 4(Fe)   | -1(Np)/ 4(Fe)       | -2(Np)/ 5(Fe)       | -2(Pu)/ 4(Fe)       | -3(Pu)/ 5(Fe)       |
|                                                | Before ET     | Before ET           | After ET            | Before ET           | After ET            |
| Expected sum of spin                           | (0+4) 4       | (-1 + 4) 3          | (-2 + 5) 3          | (-2 + 4) 2          | (-3 + 5) 2          |
| Sum of spin (Bader)                            | (0+4.00)<br>4 | (-0.90 + 3.90)<br>3 | (-1.65 + 4.65)<br>3 | (-2.00 + 4.00)<br>2 | (-3.00 + 4.99)<br>2 |
| Sum of spin (Mulliken)                         | (0+4)<br>4    | (-0.94 + 3.94)<br>3 | (-1.66 + 4.66)<br>3 | (-2.00 + 4.00)<br>2 | (-2.99 + 4.99)<br>2 |
| Expected $S(S+1)$                              | 6.0           | 5.25                | 6.75                | 4.0                 | 5.0                 |
| Calculated $\langle S^2 \rangle$ by Gaussian   | 6.0           | 4.8                 | 5.8                 | 4.1                 | 5.1                 |
| % difference of $\langle S^2 \rangle - S(S+1)$ | 0             | -8.6                | -14.1               | 2.5                 | 2.0                 |

## References

1. A. D. Becke, *J Chem Phys*, 1993, **98**, 5648-5652.
2. C. T. Lee, W. T. Yang and R. G. Parr, *Phys Rev B*, 1988, **37**, 785-789.
3. G. A. Shamov and G. Schreckenbach, *J Phys Chem A*, 2005, **109**, 10961-10974.
4. K. Arumugam and N. A. Burton, *Physical Chemistry Chemical Physics*, 2019, **21**, 3227-3241.
5. P. Wahlin, C. Danilo, V. Vallet, F. Real, J. P. Flament and U. Wahlgren, *Journal of Chemical Theory and Computation*, 2008, **4**, 569-577.
6. C. Adamo and V. Barone, *J Chem Phys*, 1999, **110**, 6158-6170.
7. Y. Zhao and D. G. Truhlar, *J Chem Phys*, 2006, **125**.
8. T. H. Dunning, *J Chem Phys*, 1989, **90**, 1007-1023.
9. H. F. Schaefer, *Methods of electronic structure theory*, Plenum Press, New York, 1st edn., 1977.
10. W. Küchle, M. Dolg, H. Stoll and H. Preuss, *J Chem Phys*, 1994, **100**, 7535-7542.
11. M. Dolg, U. Wedig, H. Stoll and H. Preuss, *J Chem Phys*, 1987, **86**, 866-872.
12. W. Küchle, M. Dolg, H. Stoll and H. Preuss, *Mol Phys*, 1991, **74**, 1245-1263.
13. E. R. Batista, R. L. Martin, P. J. Hay, J. E. Peralta and G. E. Scuseria, *J Chem Phys*, 2004, **121**, 2144-2150.
14. Y. K. Han and K. Hirao, *J Chem Phys*, 2000, **113**, 7345-7350.
15. N. Ismail, J. L. Heully, T. Saue, J. P. Daudey and C. J. Marsden, *Chem Phys Lett*, 1999, **300**, 296-302.
16. P. Di Bernardo, P. L. Zanonato, F. Benetollo, A. Melchior, M. Tolazzi and L. Rao, *Inorg Chem*, 2012, **51**, 9045-9055.
17. G. Schreckenbach and G. A. Shamov, *Accounts of Chemical Research*, 2010, **43**, 19-29.
18. J. Grafenstein, E. Kraka, M. Filatov and D. Cremer, *Int J Mol Sci*, 2002, **3**, 360-394.
19. P. K. Nandi, T. Kar and A. B. Sannigrahi, *J Mol Struc-Theochem*, 1996, **362**, 69-75.
